# Supplementary material
Source: PubMed Central journal article supplement (PMC8637393)
Supplement: jamadermatol-e214242-s001.pdf [file jamadermatol-e214242-s001.pdf]

## Supplemental Online Content

Sun Q, Burgren NM, Cheraghlou S, et al. The genomic and phenotypic landscape of ichthyosis: an analysis of 1000 kindreds. *JAMA Dermatol*. Published online December 1, 2021. doi:10.1001/jamadermatol.2021.4242

**eTable 1.** Questionnaire questions

**eTable 2a.** Kindreds with recessive inheritance (n=629)

**eTable 2b.** Kindreds with dominant inheritance (n=240)

**eTable 3.** Novel mutations (n=265)

**eFigure 1.** Geographic distribution of 1000 kindreds

**eFigure 2.** Distribution of trios, dyads and probands among 1000 kindreds

**eFigure 3.** Phenotypes of ARCI due to *TGM1* mutations

**eFigure 4.** Phenotypes of ARCI due to *ABCA12* mutations

**eFigure 5.** Phenotypes of ARCI due to *ALOX12B* mutations

**eFigure 6.** Phenotypes of ARCI due to *ALOXE3* mutations

**eFigure 7.** Phenotypes of ACRI due to *NIPAL4* mutations

**eFigure 8.** Phenotypes of ARCI due to *PNPLA1* mutations

**eFigure 9.** Phenotypes of Netherton syndrome due to *SPINK5* mutations

**eFigure 10.** Phenotypes of ARCI due to *CYP4F22* mutations

**eFigure 11.** Phenotypes of EI due to *KRT10* mutations

**eFigure 12.** Phenotypes of EI due to *KRT1* mutations

This supplemental material has been provided by the authors to give readers additional information about their work.

**eTable 1. Questionnaire questions**

| <b>Phenotype</b>   | <b>Question asked</b>                                                                                                                                                                                                                                        |
|--------------------|--------------------------------------------------------------------------------------------------------------------------------------------------------------------------------------------------------------------------------------------------------------|
| Collodion-membrane | Were you born with a 'parchment' or 'cellophane' (collodion) membrane covering your skin?                                                                                                                                                                    |
| Skin pain          | Do you have pain in your skin?                                                                                                                                                                                                                               |
| Pruritus           | Does your skin itch?                                                                                                                                                                                                                                         |
| Skin odor          | Does your skin have an odor?                                                                                                                                                                                                                                 |
| Skin infections    | Have you had problems with infections of your skin?                                                                                                                                                                                                          |
| Hypohydrosis       | Do you perspire normally—not at all, less than most people, more than most people                                                                                                                                                                            |
| Hearing problems   | Did you now or at one time have hearing or other ear problems?                                                                                                                                                                                               |
| Eye problems       | Does the light hurt your eyes?<br>Can you fully close your eyes when sleeping?<br>Do you now or did you at one time have other eye problems (e.g. cataracts, photophobia, ectropion, corneal erosions, scarring, impaired vision, glaucoma, blindness, etc)? |
| Alopecia           | Do you have any hair loss?                                                                                                                                                                                                                                   |

**eTable 2a. Kindreds with recessive inheritance (n=629)**

| <b>GENE</b>     | <b>TOTAL KINDREDS</b> | <b>COMPOUND HETEROZYGOUS</b> | <b>HOMOZYGOUS</b> |
|-----------------|-----------------------|------------------------------|-------------------|
| <i>TGM1</i>     | 169                   | 113                          | 56                |
| <i>ABCA12</i>   | 66                    | 57                           | 9                 |
| <i>ALOX12B</i>  | 63                    | 47                           | 16                |
| <i>NIPAL4</i>   | 56                    | 14                           | 42                |
| <i>*STS</i>     | 47                    | N/A                          | N/A               |
| <i>FLG</i>      | 46                    | 33                           | 13                |
| <i>ALOXE3</i>   | 40                    | 22                           | 18                |
| <i>SPINK5</i>   | 30                    | 20                           | 10                |
| <i>PNPLA1</i>   | 29                    | 16                           | 13                |
| <i>CYP4F22</i>  | 17                    | 7                            | 10                |
| <i>ABHD5</i>    | 9                     | 3                            | 6                 |
| <i>KDSR</i>     | 6                     | 6                            | 0                 |
| <i>ALDH3A2</i>  | 6                     | 2                            | 4                 |
| <i>CERS3</i>    | 5                     | 2                            | 3                 |
| <i>SDR9C7</i>   | 6                     | 3                            | 3                 |
| <i>CDSN</i>     | 4                     | 1                            | 3                 |
| <i>*MBTPS2</i>  | 4                     | N/A                          | N/A               |
| <i>AP1B1</i>    | 3                     | 1                            | 2                 |
| <i>CSTA</i>     | 3                     | 1                            | 2                 |
| <i>SLC27A4</i>  | 3                     | 2                            | 1                 |
| <i>SNAP29</i>   | 2                     | 0                            | 2                 |
| <i>ST14</i>     | 4                     | 0                            | 4                 |
| <i>TGM5</i>     | 3                     | 3                            | 0                 |
| <i>CAST</i>     | 1                     | 0                            | 1                 |
| <i>CLDN1</i>    | 1                     | 0                            | 1                 |
| <i>ERCC2</i>    | 1                     | 1                            | 0                 |
| <i>KANK2</i>    | 1                     | 0                            | 1                 |
| <i>LSS</i>      | 1                     | 1                            | 0                 |
| <i>RSPO1</i>    | 1                     | 0                            | 1                 |
| <i>SERPINB7</i> | 1                     | 1                            | 0                 |
| <i>PERP</i>     | 1                     | 0                            | 1                 |
| <b>TOTAL</b>    | <b>629</b>            | <b>356</b>                   | <b>222</b>        |

*\*indicates X-linked inheritance*

**eTable 2b. Kindreds with dominant inheritance (n=240)**

| <b>GENE</b>    | <b>TOTAL KINDREDS</b> |
|----------------|-----------------------|
| <i>KRT10</i>   | 94                    |
| <i>KRT1</i>    | 31                    |
| <i>ATP2C1</i>  | 18                    |
| <i>KRT2</i>    | 17                    |
| <i>GJB2</i>    | 14                    |
| <i>ATP2A2</i>  | 15                    |
| <i>GJA1</i>    | 8                     |
| <i>DSP</i>     | 7                     |
| <i>DSG1</i>    | 5                     |
| <i>GJB4</i>    | 4                     |
| <i>GJB3</i>    | 3                     |
| <i>LOR</i>     | 4                     |
| <i>NSDHL</i>   | 3                     |
| <i>DSC2</i>    | 2                     |
| <i>EBP</i>     | 2                     |
| <i>POGLUT1</i> | 2                     |
| <i>RHBDF2</i>  | 2                     |
| <i>TRPV3</i>   | 2                     |
| <i>ASPRV1</i>  | 1                     |
| <i>CARD14</i>  | 2                     |
| <i>ELOVL1</i>  | 1                     |
| <i>GJB6</i>    | 1                     |
| <i>KRT14</i>   | 1                     |
| <i>SREBF1</i>  | 1                     |
| <b>TOTAL</b>   | <b>240</b>            |

**eTable 3. Novel mutations (n=266)**

| Gene   | Nucleotide change                           | Amino acid change  | Race/ethnicity  |
|--------|---------------------------------------------|--------------------|-----------------|
| ABCA12 | c.2827G>C                                   | p.A943P            | Black           |
| ABCA12 | c.7536C>A                                   | p.Y2512*           | Caucasian       |
| ABCA12 | c.6853-5A>G                                 | Intron/Splice site | Caucasian       |
| ABCA12 | c.4274A>G                                   | p.Q1425R           | Caucasian       |
| ABCA12 | c.2140T>C                                   | p.R714X            | N/A             |
| ABCA12 | c.6780_6781insAA                            | p.T227Tfs*13       | Asian           |
| ABCA12 | c.2592+1G>A                                 | Intron/Splice site | Caucasian       |
| ABCA12 | c.7664A>G                                   | p.Q2555R           | Caucasian       |
| ABCA12 | c.724_725insA                               | p.V242Sfs*27       | Hispanic/Latino |
| ABCA12 | c.4579+3A>G                                 | Intron/Splice site | N/A             |
| ABCA12 | c.59_61delAAA                               | p.20delK           | Native American |
| ABCA12 | c.740_743delTCAG                            | p.V247Efs*32       | Native American |
| ABCA12 | c.2519_2520delAA                            | p.Q840Rfs*5        | Caucasian       |
| ABCA12 | c.7332_7334delCAC                           | p.2445delT         | Caucasian       |
| ABCA12 | c.2033_2036delATCA                          | p.N678Rfs*10       | Caucasian       |
| ABCA12 | c.2864-6T>A                                 | Intron/Splice site | Caucasian       |
| ABCA12 | c.451_452delG                               | p.G151Efs*21       | Caucasian       |
| ABCA12 | c.430_431insA                               | p.S144Kfs*3        | Caucasian       |
| ABCA12 | c.3058_3059insATATTTATTTATTTTTTTTTATTTACAGG | p.A1020Ifs*17      | Caucasian       |
| ABCA12 | c.1131C>G                                   | p.Y377*            | Caucasian       |
| ABCA12 | c.6481C>T                                   | p.Q2161*           | Caucasian       |
| ABCA12 | c.6200T>G                                   | p.L2067R           | Hispanic/Latino |
| ABCA12 | c.2180delA                                  | p.Q727Qfs*13       | Hispanic/Latino |
| ABCA12 | c.7652T>C                                   | p.F2551S           | Hispanic/Latino |
| ABCA12 | c.7181C>A                                   | p.T2394K           | Caucasian       |

| Gene    | Nucleotide change                      | Amino acid change                      | Race/ethnicity  |
|---------|----------------------------------------|----------------------------------------|-----------------|
| ABCA12  | c.1414C>T                              | p.Q472*                                | Caucasian       |
| ABCA12  | c.6139_6148delGCGTTTTTCAA              | p.2047-2049 delAFS,<br>p.2050I>L fs*18 | Caucasian       |
| ABCA12  | c.4841G>T                              | p.G1614V                               | Caucasian       |
| ABCA12  | c.3679G>C                              | p.E1227Q                               | Caucasian       |
| ABCA12  | c.6146_6147insT                        | p.2046S>Ffs*16                         | Asian           |
| ABCA12  | c.872G>A                               | p.S291N                                | Asian           |
| ABCA12  | c.1131C>A                              | p.Y377*                                | Hispanic/Latino |
| ABCA12  | c.313_317+9delGACAGGTGGGGGCA           | p.727Q>Qfs*13                          | Asian           |
| ABCA12  | c.5381+1G>C                            | Intron/Splice site                     | Caucasian       |
| ABCA12  | c.2274_2275insA                        | p.L758Lfs*4                            | Black           |
| ABCA12  | c.5381+4A>G                            | Intron/Splice site                     | Caucasian       |
| ABCA12  | c.4187_4210delGGGCCTCAGCAGGCACCATTTTTG | p.GASAGTIFV1396V                       | Hispanic/Latino |
| ABCA12  | c.7239+5G>A                            | Intron/Splice site                     | Hispanic/Latino |
| ABCA12  | c.7283T>C                              | p.L2428P                               | Hispanic/Latino |
| ABCA12  | c.5822T>G                              | p.L1941R                               | Hispanic/Latino |
| ABCA12  | c.5260C>T                              | p.P1754S                               | Hispanic/Latino |
| ABHD5   | c.960+5G>A                             | Intron/Splice site                     | N/A             |
| ALDH3A2 | c.1225G>C                              | p.A409P                                | Caucasian       |
| ALOX12B | c.1109T>C                              | p.L370P                                | Caucasian       |
| ALOX12B | c.2074C>T                              | p.P692S                                | Caucasian       |
| ALOX12B | c.245G>C                               | p.W82S                                 | Caucasian       |
| ALOX12B | c.1353delC                             | p.L451Lfs*16                           | N/A             |
| ALOX12B | c.1462C>T                              | p.R488C                                | Caucasian       |
| ALOX12B | c.1350_1351insC                        | p.G450Gfs*28                           | Caucasian       |
| ALOX12B | c.353-2A>G                             | Intron/Splice site                     | Caucasian       |
| ALOX12B | c.291delC                              | p.Y97Yfs*100                           | Caucasian       |

| Gene    | Nucleotide change | Amino acid change  | Race/ethnicity  |
|---------|-------------------|--------------------|-----------------|
| ALOX12B | c.2061C>G         | p.Y687*            | Caucasian       |
| ALOX12B | c.2058_2059insAG  | p.687Y>Sfs*9       | Caucasian       |
| ALOX12B | c.673G>A          | p.G225S            | Hispanic/Latino |
| ALOX12B | c.877A>G          | p.M293V            | Hispanic/Latino |
| ALOX12B | c.2105A>G         | p.*702W            | Hispanic/Latino |
| ALOX12B | c.1755+1G>A       | Intron/Splice site | Caucasian       |
| ALOX12B | c.93G>T           | p.Q31H             | Caucasian       |
| ALOX12B | c.1720T>C         | p.C574R            | Caucasian       |
| ALOX12B | c.1498G>C         | p.D500H            | Caucasian       |
| ALOX12B | c.631_633delTTC   | p.211delF          | Black           |
| ALOX12B | c.340C>T          | p.R114w            | Hispanic/Latino |
| ALOX12B | c.311G>A          | p.W104*            | Hispanic/Latino |
| ALOX12B | c.1A>G            | p.M1V              | Native American |
| ALOX12B | c.1532+4A>G       | Intron/Splice site | Native American |
| ALOX12B | c.214G>T          | p.E72*             | Caucasian       |
| ALOX12B | c.406_408delGAG   | p.136delE          | Hispanic/Latino |
| ALOX12B | c.772T>C          | p.W258R            | Caucasian       |
| ALOX12B | c.1498G>T         | p.D500Y            | Caucasian       |
| ALOX12B | c.190C>T          | p.L64F             | Caucasian       |
| ALOX12B | c.1273_1274insG   | p.K425Efs*24       | Hispanic/Latino |
| ALOX12B | c.406_408delCTC   | p.136delE          | Caucasian       |
| ALOX12B | c.242delC         | p.81P>Lfs*116      | Caucasian       |
| ALOX12B | c.1600C>T         | p.Q534*            | Caucasian       |
| ALOX12B | c.1325G>A         | p.R442Q            | Caucasian       |
| ALOX12B | c.G1579A          | p.V527M            | Caucasian       |
| ALOXE3  | c.2181+2T>G       | Intron/Splice site | Caucasian       |
| ALOXE3  | c.2466C>G         | p.N822K            | Caucasian       |

| Gene   | Nucleotide change  | Amino acid change  | Race/ethnicity  |
|--------|--------------------|--------------------|-----------------|
| ALOXE3 | c.599G>C           | p.R200P            | Caucasian       |
| ALOXE3 | c.1348_1349insC    | p.450L>Pfs*58      | Caucasian       |
| ALOXE3 | c.830+1G>T         | Intron/Splice site | Caucasian       |
| ALOXE3 | c.1076+1C>T        | Intron/Splice site | Caucasian       |
| ALOXE3 | c.2377G>T          | p.E793*            | Caucasian       |
| ALOXE3 | c.2360delT         | p.L787R            | Caucasian       |
| ALOXE3 | c.2203C>G          | p.P735A            | Hispanic/Latino |
| ALOXE3 | c.748G>C           | p.A250P            | Hispanic/Latino |
| ATP2A2 | c.2828A>G          | p.H943R            | N/A             |
| ATP2A2 | c.669_670insG      | p.V223Vfs*7        | Caucasian       |
| ATP2A2 | c.1334T>C          | p.L445P            | Caucasian       |
| ATP2A2 | c.1484C>T          | p.S495L            | Hispanic/Latino |
| ATP2C1 | c.2477_2480delTTGT | p.F826Sfs*10       | N/A             |
| ATP2C1 | c.1510C>T          | p.Q505*            | Caucasian       |
| ATP2C1 | c.2872delC         | p.P958Pfs*9        | Caucasian       |
| ATP2C1 | c.1471G>T          | p.E491*            | Hispanic/Latino |
| ATP2C1 | c.1037T>C          | p.I346T            | Caucasian       |
| ATP2C1 | c.1327_1328insAC   | p.C443Tfs*8        | Caucasian       |
| ATP2C1 | c.42C>A            | p.N14K             | Caucasian       |
| ATP2C1 | c.277delG          | p.G93Afs*38        | Caucasian       |
| ATP2C1 | c.1515+1 G>A       | splice site        | Caucasian       |
| CAST   | c.454C>T           | p.Q152*            | Hispanic/Latino |
| CDSN   | c.85G>C            | p.G29R             | Black           |
| CDSN   | c.418C>A           | p.H140N            | N/A             |
| CDSN   | c.447-449del AAG   | p.GS149G           | Caucasian       |
| CERS3  | c.47T>G            | p.L16R             | Hispanic/Latino |
| CERS3  | c.223C>T           | p.R75*             | Hispanic/Latino |



| Gene    | Nucleotide change | Amino acid change | Race/ethnicity  |
|---------|-------------------|-------------------|-----------------|
| CYP4F22 | c.1043T>C         | p.L348P           | Native American |
| CYP4F22 | c.491A>C          | p.H164P           | Native American |
| CYP4F22 | c.215T>C          | p.L72P            | Hispanic/Latino |
| CYP4F22 | c.15_19delAGACC   | p.T5Tfs*73        | Caucasian       |
| CYP4F22 | c.980delC         | p.A327Afs*43      | N/A             |
| CYP4F22 | c.1012G>T         | p.D338Y           | Caucasian       |
| CYP4F22 | c.58_59insG       | p.R20Rfs*60       | Caucasian       |
| CYP4F22 | c.59_60insG       | p.R20Rfs*60       | Caucasian       |
| DSC2    | c.C1264T          | p.P422S           | Hispanic/Latino |
| DSG1    | c.313delA         | p.K105Kfs*7       | Caucasian       |
| DSG1    | c.1892G>C         | p.G631A           | Caucasian       |
| DSG1    | c.337ins T        | p.113S>Ffs*4      | Black           |
| EBP     | c.473A>G          | p.Q158R           | Caucasian       |
| EBP     | c.340_341insAAACT | p.E114Gfs*26      | Caucasian       |
| ELOVL1  | c.494C>T          | p.S165F           | Caucasian       |
| GJB2    | c.263C>T          | p.A88V            | Caucasian       |
| GJB2    | c.134G>C          | p.G45A            | Asian           |
| GJB2    | c.42C>A           | p.N14K            | Caucasian       |
| GJB2    | c.148G>A          | p.D50N            | Asian           |
| GJB2    | c.83T>A           | p.L28H            | Caucasian       |
| GJB3    | c.625C>T          | p.L209F           | Caucasian       |
| KRT1    | c.1455_1457delCCT | p.486delL         | Asian           |
| KRT1    | c.1752_1753insG   | p.S584Rfs         | Native American |
| KRT1    | c.592G>A          | p.V198M           | N/A             |
| KRT1    | c.1016delT        | p.M339Rfs*23      | Hispanic/Latino |
| KRT1    | c.575C>A          | p.A192D           | N/A             |
| KRT1    | c.562A>C          | p.N188H           | N/A             |

| Gene  | Nucleotide change                 | Amino acid change  | Race/ethnicity  |
|-------|-----------------------------------|--------------------|-----------------|
| KRT1  | c.1539delT                        | p.S513Rfs*100      | Caucasian       |
| KRT1  | c.1430T>C                         | p.L477P            | N/A             |
| KRT1  | c.T584A                           | p.I195N            | Black           |
| KRT10 | c.1373delG                        | p.S458I            | Caucasian       |
| KRT10 | c.1301_1303delAAC                 | p.434delQ          | Caucasian       |
| KRT10 | c.1547_1548insG                   | p.G516Gfs*65       | Caucasian       |
| KRT10 | c.1374-2A>C                       | Intron/Splice site | Caucasian       |
| KRT10 | c.1373+1G>A                       | Intron/Splice site | Native American |
| KRT10 | c.1374-1G>C                       | Intron/Splice site | Native American |
| KRT10 | c.1364_1365delGA                  | p.G455Gfs*125      | Caucasian       |
| KRT10 | c.1345T>C                         | p.Y449H            | N/A             |
| KRT10 | c.458T>C                          | p.L153P            | N/A             |
| KRT10 | c.1467_1478delICGGCCACGGCGG       | p.G489G            | Caucasian       |
| KRT10 | c.1322G>C                         | p.R441P            | Caucasian       |
| KRT10 | c.950_951insCT                    | p.L317Pfs*3        | Caucasian       |
| KRT10 | c.1521_1536delAAGCTCCGGCGGCGGC    | p.G507G            | Caucasian       |
| KRT10 | c.1361_1365delAAGGA               | p.E454Gfs*125      | N/A             |
| KRT10 | c.1373+1G>C                       | Intron/Splice site | N/A             |
| KRT10 | c.1373+2T>G                       | Intron/Splice site | Caucasian       |
| KRT10 | c.1348_1389insC                   | p.R450Pfs*131      | Caucasian       |
| KRT10 | c.460A>G                          | p.N154D            | Caucasian       |
| KRT10 | c.1305_1307delCCT                 | p.436delL          | N/A             |
| KRT10 | c.1566_1567insAAGCTCCAGCGGCGGCCAC | p.G523Kfs*64       | Hispanic/Latino |
| KRT10 | c.1307T>C                         | p.L436P            | Caucasian       |
| KRT10 | c.1345T>A                         | p.Y449N            | Caucasian       |
| KRT10 | c.1668_1669insG                   | p.G556Gfs*25       | Caucasian       |
| KRT10 | c.470C>T                          | p.P157L            | Caucasian       |

| Gene   | Nucleotide change         | Amino acid change    | Race/ethnicity  |
|--------|---------------------------|----------------------|-----------------|
| KRT10  | c.998G>A                  | p.R33H               | Caucasian       |
| KRT10  | c.551T>C                  | p.I184T              | Black           |
| KRT10  | c.1084G>A                 | p.A362T              | Caucasian       |
| KRT10  | c.862G>A                  | p.E288K              | Asian           |
| KRT2   | c.126C>G                  | p.C42W               | N/A             |
| KRT2   | c.1430T>A                 | p.I477N              | Hispanic/Latino |
| KRT2   | c.558C>G                  | p.N186K              | Caucasian       |
| KRT2   | c.561-563delCAA           | p.NK187K             | Caucasian       |
| KRT2   | c.1912T>C                 | p.F638L              | Caucasian       |
| LOR    | c.672dupT                 | p.Y225Lfs*111        | N/A             |
| LSS    | c.1417dup C               | p.H473Pfs*32         | Caucasian       |
| MBTPS2 | c.686T>C                  | p.F229S              | Asian           |
| MBTPS2 | c.1427T>C                 | p.L476S              | Caucasian       |
| NIPAL4 | c.463+5G>T                | Intron/Splice site   | Hispanic/Latino |
| NIPAL4 | c.187A>G                  | p.M63V               | Caucasian       |
| NIPAL4 | c.555C>A                  | p.Y185*              | Native American |
| NIPAL4 | c.527C>A                  | p.A176D              | Caucasian       |
| NSDHL  | c.308A>G                  | p.H103R              | Caucasian       |
| NSDHL  | c.612-613insT             | p.G205Wfs*66         | N/A             |
| PNPLA1 | c.448T>C                  | p.S140P              | Hispanic/Latino |
| PNPLA1 | c.448T>C                  | p.C150R              | Hispanic/Latino |
| PNPLA1 | c.1296delG                | p.V432Vfs*24         | Asian           |
| PNPLA1 | c.362A>C                  | p.H121P              | Caucasian       |
| PNPLA1 | c.440C>G                  | p.A147G              | Caucasian       |
| PNPLA1 | c.939_951delGTGGGTTCCCAAA | p.EWVPK314-317Efs*50 | Asian           |
| PNPLA1 | c.421A>G                  | p.K46E               | Asian           |
| PNPLA1 | c.157T>C                  | p.S53P               | Hispanic/Latino |

| Gene   | Nucleotide change           | Amino acid change                                 | Race/ethnicity  |
|--------|-----------------------------|---------------------------------------------------|-----------------|
| PNPLA1 | c.158C>G                    | p.S53W                                            | Asian           |
| PNPLA1 | c.143G>C                    | p.R48P                                            | Caucasian       |
| PNPLA1 | c.500G>T                    | p.G167V                                           | Hispanic/Latino |
| PNPLA1 | c.272delC                   | p.S91Sfs*9                                        | Caucasian       |
| PNPLA1 | c.775+2T>C                  | Intron/Splice site                                | Caucasian       |
| RSPO1  | c.291C>A                    | p.C97*                                            | Asian           |
| SDR9C7 | c.364_365insA               | p.T122Nfs*4                                       | Middle Eastern  |
| SNAP29 | c.355_356insG               | p.119insL                                         | Hispanic/Latino |
| SPINK5 | c.316_317delGA              | p.D106Wfs*7                                       | Caucasian       |
| SPINK5 | c.238_239insG               | p.A80Gfs*19                                       | Caucasian       |
| SPINK5 | c.140A>G                    | p.D47G                                            | N/A             |
| SPINK5 | c.2459_2462delAAAA          | p.E820Efs*121                                     | N/A             |
| SPINK5 | c.2469delG                  | p.K823Kfs*119                                     | N/A             |
| SPINK5 | c.81+2T>A                   | Intron/Splice site                                | N/A             |
| SPINK5 | c.2577_2578delA             | p.G859Gfs*83 (c.2577), p.K860Sfs*82 (c.2578-2579) | N/A             |
| SPINK5 | c.2425_2426insT             | p.M809Yfs*3                                       | N/A             |
| SPINK5 | c.81+5G>A                   | Intron/Splice site                                | N/A             |
| SPINK5 | c.411_1delG                 | Intron/Splice site                                | N/A             |
| SPINK5 | c.235_236insG               | p.R79Rfs*20                                       | Hispanic/Latino |
| SPINK5 | c.1346_1347delTT            | p.L449Lfs*7                                       | Asian           |
| SPINK5 | c.2459_2460insA             | p.E820Efs*8                                       | Caucasian       |
| SPINK5 | c.1086_1087delAT            | p.S362Sfs*7                                       | Caucasian       |
| SPINK5 | c.2259_2260insA             | p.R753Rfs*4                                       | Caucasian       |
| SPINK5 | c.2577delA                  | p.G859Gfs*83                                      | Caucasian       |
| SPINK5 | c.2029-2039 del GAGGAAAGAAA | p.677-680EERK>EERRfs*29                           | Middle Eastern  |
| ST14   | c.737G>C                    | p.R221C                                           | Asian           |
| TGM1   | c.2149delC                  | p.L717Ffs*34                                      | Hispanic/Latino |

| Gene | Nucleotide change      | Amino acid change  | Race/ethnicity  |
|------|------------------------|--------------------|-----------------|
| TGM1 | c.443_449delATATGCT    | p.H148Pfs*32       | Asian           |
| TGM1 | c.1294G>T              | p.R432*            | Asian           |
| TGM1 | c.407_408insAGTATGAGTA | p.Y136*            | Caucasian       |
| TGM1 | c.411_412insCGAC       | p.E138Rfs*22       | Caucasian       |
| TGM1 | c.698_699insT          | p.F233Ffs*6        | Asian           |
| TGM1 | c.411_412insCGAC       | p.E137Dfs*22       | Caucasian       |
| TGM1 | c.1121A>G              | p.PY374C           | Caucasian       |
| TGM1 | c.713delA              | p.D238Afs*92       | Hispanic/Latino |
| TGM1 | c.1504A>T              | p.K502*            | Hispanic/Latino |
| TGM1 | c.1097T>C              | p.L366P            | N/A             |
| TGM1 | c.886_889delGG         | p.G296Gfs*38       | N/A             |
| TGM1 | c.1223_1228delACACAT   | p.R396H            | Caucasian       |
| TGM1 | c.443delA              | p.H148Lfs*34       | N/A             |
| TGM1 | c.278delG              | p.G93Afs*17        | Caucasian       |
| TGM1 | c.1160-2A>C            | Intron/Splice site | Caucasian       |
| TGM1 | c.1420C>T              | p.P474S            | Caucasian       |
| TGM1 | c.2324T>G              | p.L775R            | Hispanic/Latino |
| TGM1 | c.985-3C>G             | Intron/Splice site | Caucasian       |
| TGM1 | c.1738G>A              | p.A580T            | Caucasian       |
| TGM1 | c.527C>A               | p.G273R            | Caucasian       |
| TGM1 | c.394_396delGAC        | p.132delD          | Asian           |
| TGM1 | c.1483T>C              | p.F495L            | Caucasian       |
| TGM1 | c.1956C>A              | p.Y652*            | Hispanic/Latino |
| TGM1 | c.379C>T               | p.R127*            | Hispanic/Latino |
| TGM1 | c.1552delG             | p.V518Wfs*40       | Black           |
| TGM1 | c.834delG              | p.G278Gfs*52       | Asian           |
| TGM1 | c.2226-2A>G            | Intron/Splice site | Asian           |

| Gene | Nucleotide change          | Amino acid change  | Race/ethnicity  |
|------|----------------------------|--------------------|-----------------|
| TGM1 | c.1159+1G>T                | Intron/Splice site | Hispanic/Latino |
| TGM1 | c.1223_1227delACACA        | p.D408Vfs*21       | Hispanic/Latino |
| TGM1 | c.1018delG                 | p.G340Gfs*44       | Caucasian       |
| TGM1 | c.2320C>T                  | p.Q774*            | Caucasian       |
| TGM1 | c.1271_1272insT            | p.L424Lfs*7        | Middle Eastern  |
| TGM1 | c.1646G>A                  | Intron/Splice site | Middle Eastern  |
| TGM1 | c.1086_1091delGCTTAG       | p.362_363delLS     | Middle Eastern  |
| TGM1 | c.802delG                  | p.V268Ffs*62       | Middle Eastern  |
| TGM1 | c.373A>G                   | p.N125D            | N/A             |
| TGM1 | c.1448G>T                  | p.G483V            | Caucasian       |
| TGM1 | c.1921_1927+3delGGGGCCTGTA | Intron/Splice site | Asian           |
| TGM1 | c.832G>C                   | p.G278R            | Hispanic/Latino |
| TGM1 | c.1645G>A                  | p.G549S            | Hispanic/Latino |
| TGM1 | c.1096C>G                  | p.L366V            | Asian           |
| TGM1 | c.1226_1227delCA           | p.T409Ifs*21       | Caucasian       |
| TGM1 | c.411_412insCGAC           | p.D137Rfs*22       | Caucasian       |
| TGM1 | c.1196C>T                  | p.T399I            | Asian           |
| TGM1 | c.757+1G>T                 | Intron/Splice site | Hispanic/Latino |
| TGM1 | c.1233_1234insA            | p.T411Yfs*19       | Hispanic/Latino |
| TGM1 | c.456_458delCCT            | p.LL152L           | Black           |
| TGM1 | c.890T>C                   | p.V297A            | Caucasian       |
| TGM1 | c.391A>G                   | p.T131A            | Asian           |
| TGM1 | c.1130G>A                  | p.A176D            | Caucasian       |
| TGM1 | c.2060G>A                  | p.R687H            | Asian           |
| TGM1 | c.C427T                    | p.R143C            | Hispanic/Latino |
| TGM1 | c.877-2T>C                 | Intron/Splice site | Caucasian       |

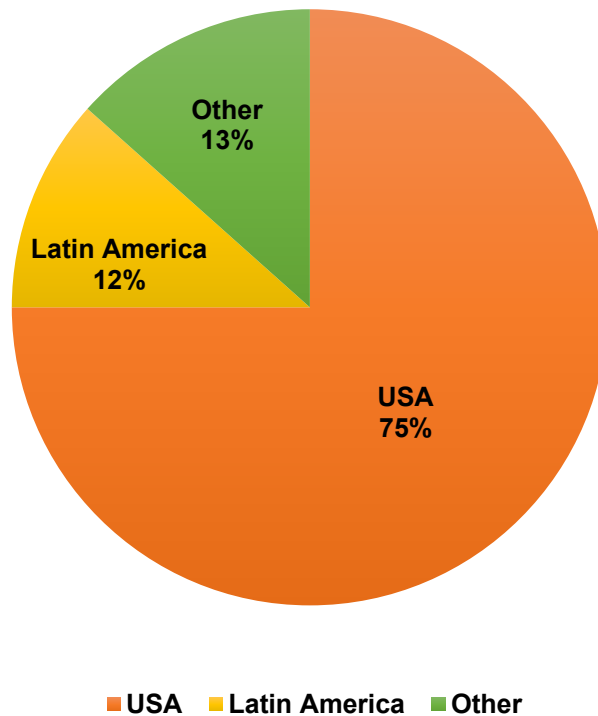

**eFigure 1. Geographic distribution of 1000 kindreds**

Among the 1000 kindreds analyzed, 750 (75%) were from the USA, 116 (12%) were from Latin America, and 134 were from Other regions, including Canada (4%), Europe (3%), Asia (3%), Africa (2%), Middle East (1%) and Australia and New Zealand (1%).

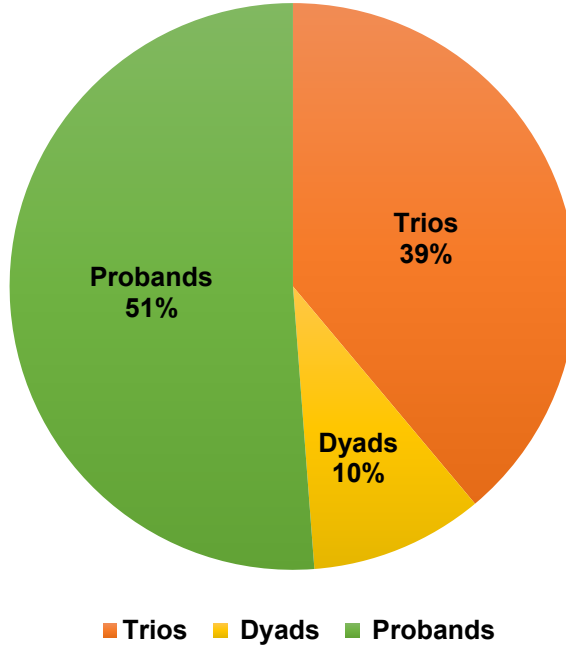

**eFigure 2. Distribution of trios, dyads and probands among 1000 kindreds**

Among the 1000 kindreds analyzed, 389 (39%) were trios (index case and both parents), 99 (10%) were dyads (index case and one parent) and 512 (51%) were probands only.



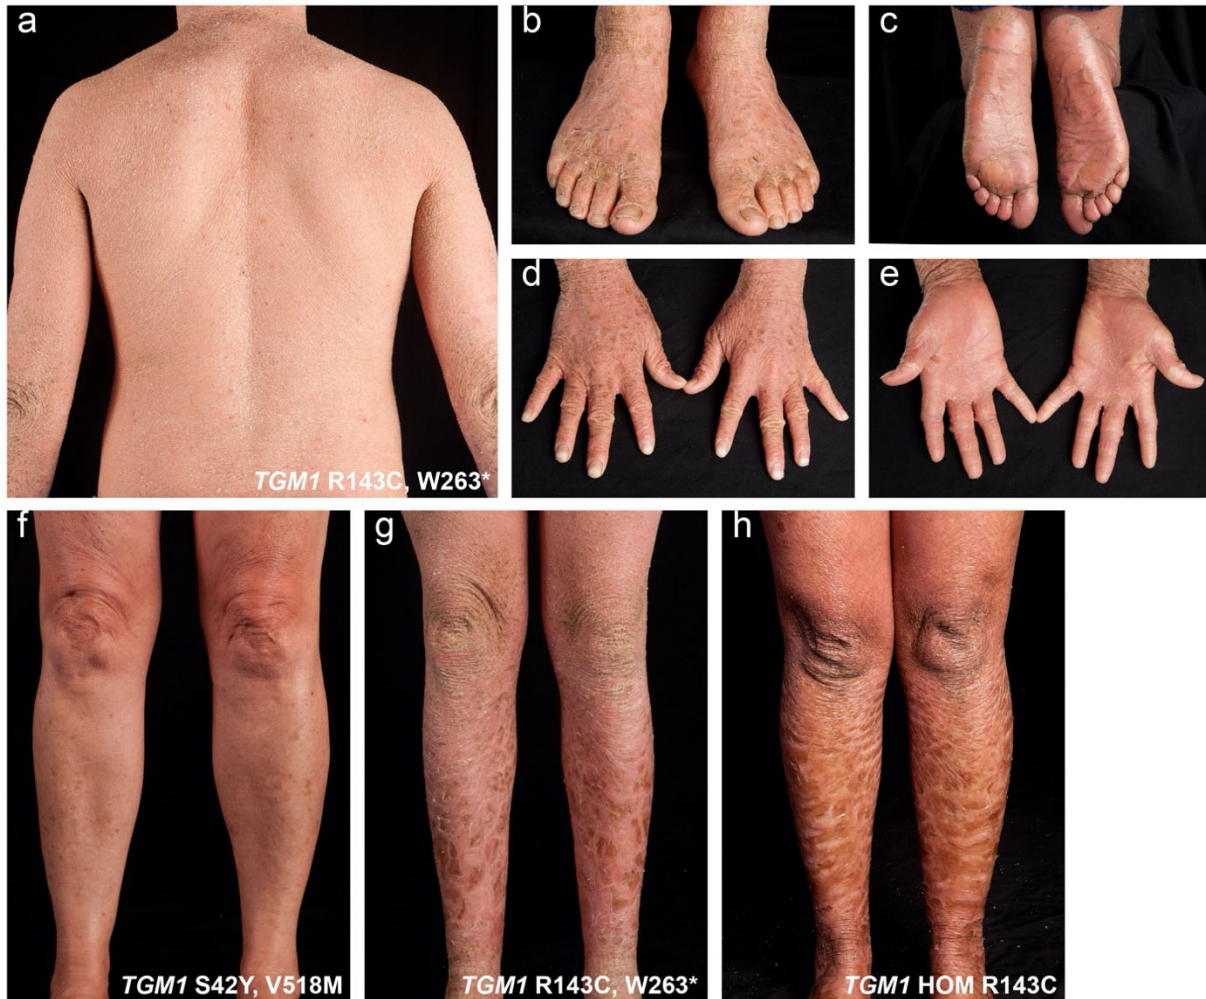

### eFigure 3. Phenotypes of ARCI due to *TGM1* mutations

(a-e) The characteristic appearance of subjects with *TGM1* mutations include flat, plate-like scales in a mosaic pattern and mild to moderate erythema. Phenotypes range from discontinuous smoothing (diminished fine skin markings, shininess) (f), confluent scales with pink erythema (g), and confluent, primarily large (>1cm) plate-like thick scales. The largest and darkest scales tend to be on the lower extremities (h).

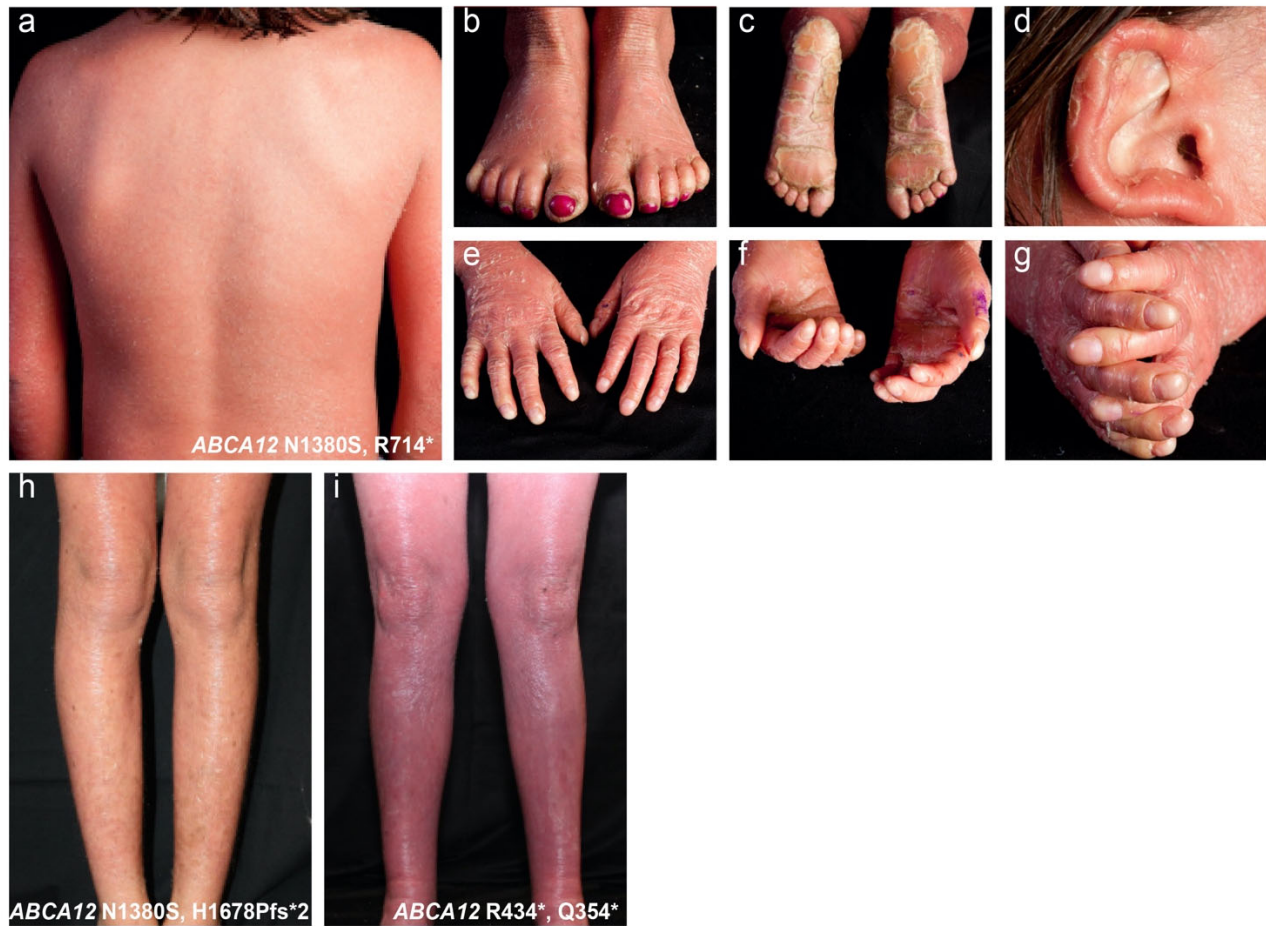

**eFigure 4. Phenotypes of ARCI due to *ABCA12* mutations**

(a-e) The characteristic appearance of ichthyosis caused by *ABCA12* mutations include significant and often severe erythema with fine white or thick lamellar scale and PPK. (d-g) *Distinguishing features* include tapered digits, hyperconvex nails, and pyknotic ears. Clinical manifestations range from mild erythema and discontinuous smoothing with small scales (h) to severe erythema with confluent smoothing and large scales (i).

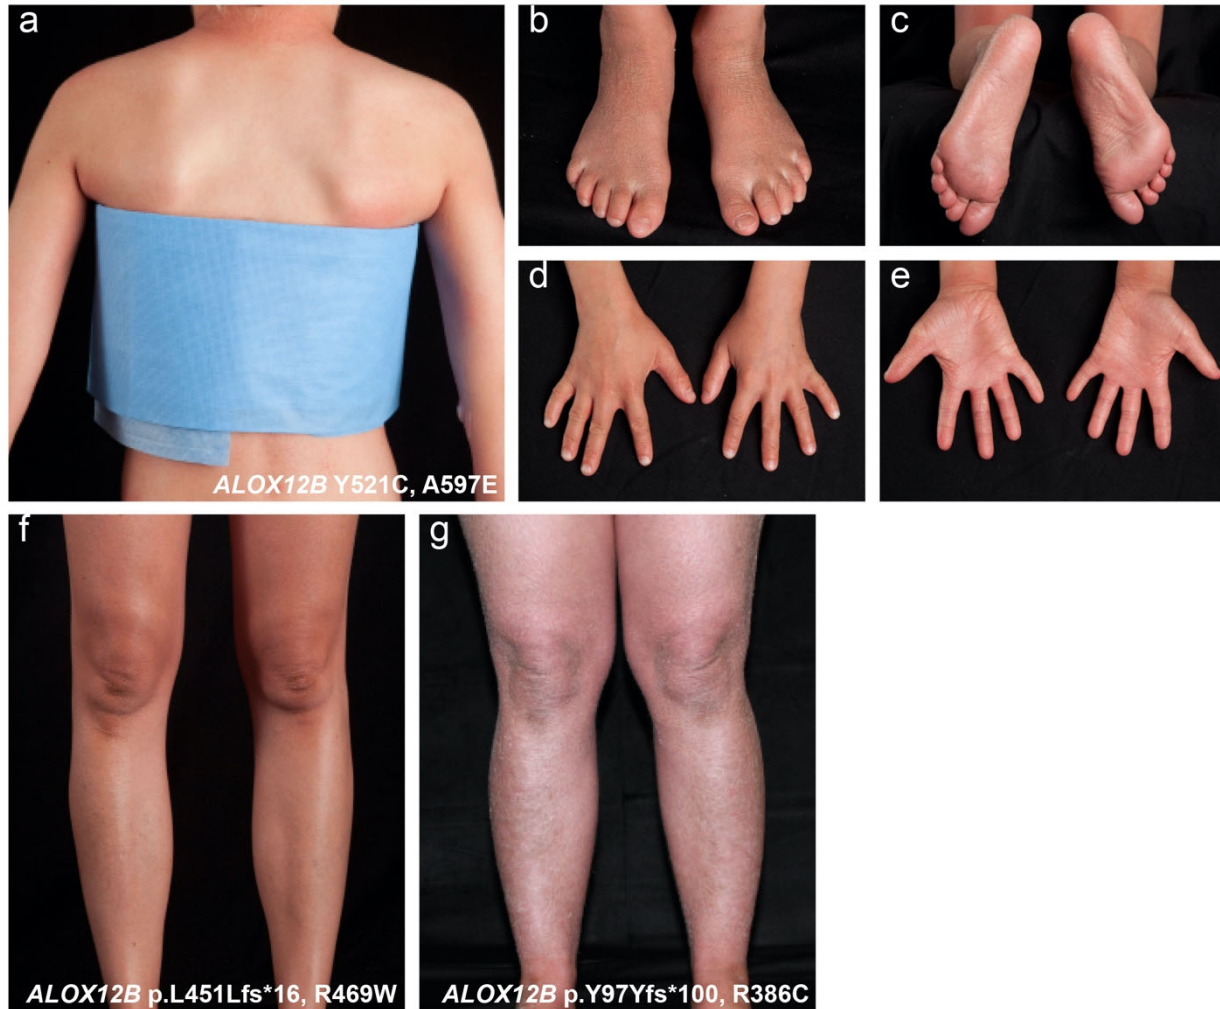

**eFigure 5. Phenotypes of ARCI due to *ALOX12B* mutations**

(a-e) The characteristic appearance of ichthyosis caused by mutations in *ALOX12B* include fine scale, absence of PPK, and erythema that is mild in some subjects. Phenotypic manifestations range from discontinuous smoothing with absence of erythema (f) to confluent fine scale and pink erythema (g).

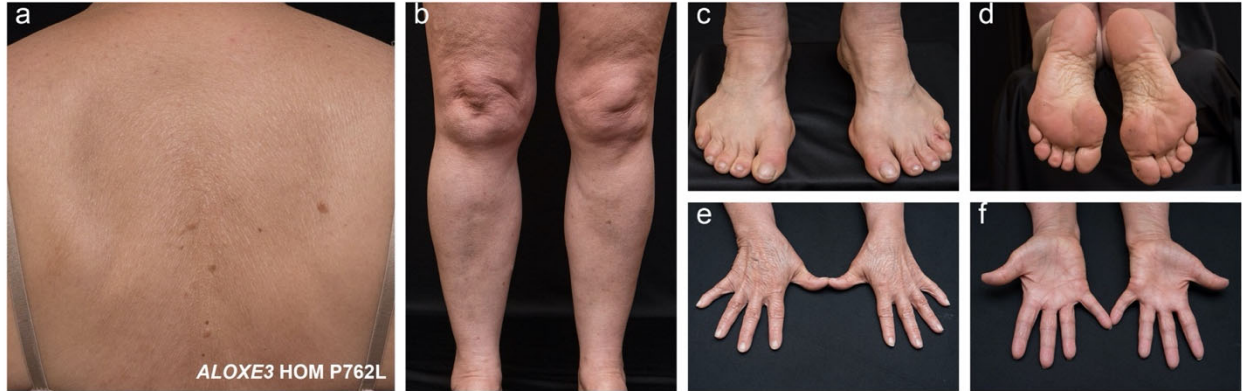

**eFigure 6. Phenotypes of ARCI due to *ALOXE3* mutations**

(a-f) Similar to *ALOX12B* mutations, the characteristics of ichthyosis caused by *ALOXE3* mutations include fine scale, absence of PPK, and minimal to mild erythema. There was minimal variation of these features among subjects.



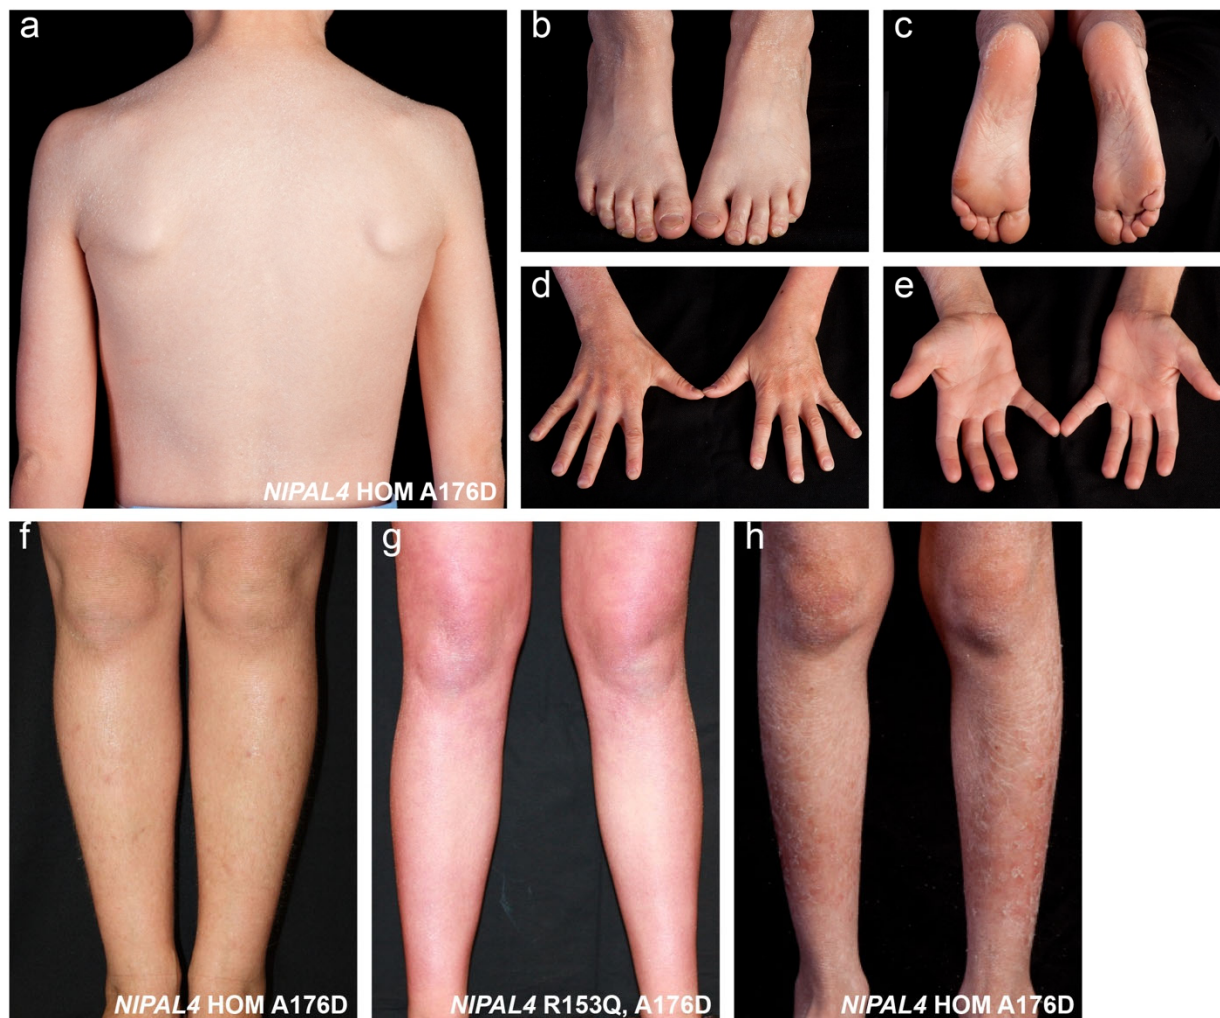

### eFigure 7. Phenotypes of ACRI due to *NIPAL4* mutations

(a-e) The characteristic appearance of ichthyosis caused by mutations in *NIPAL4* include fine scale, absence of PPK, and a varying degree of erythema. The range of clinical manifestations includes barely perceptible pink erythema with discontinuous smoothing (f), pink/red erythema with confluent, fine, white scale (g) and pink erythema with confluent scale, including some large (>1cm) scale (h). The 3 subjects in a-e, f, and h are homozygous for *NIPAL4* p.A176D.

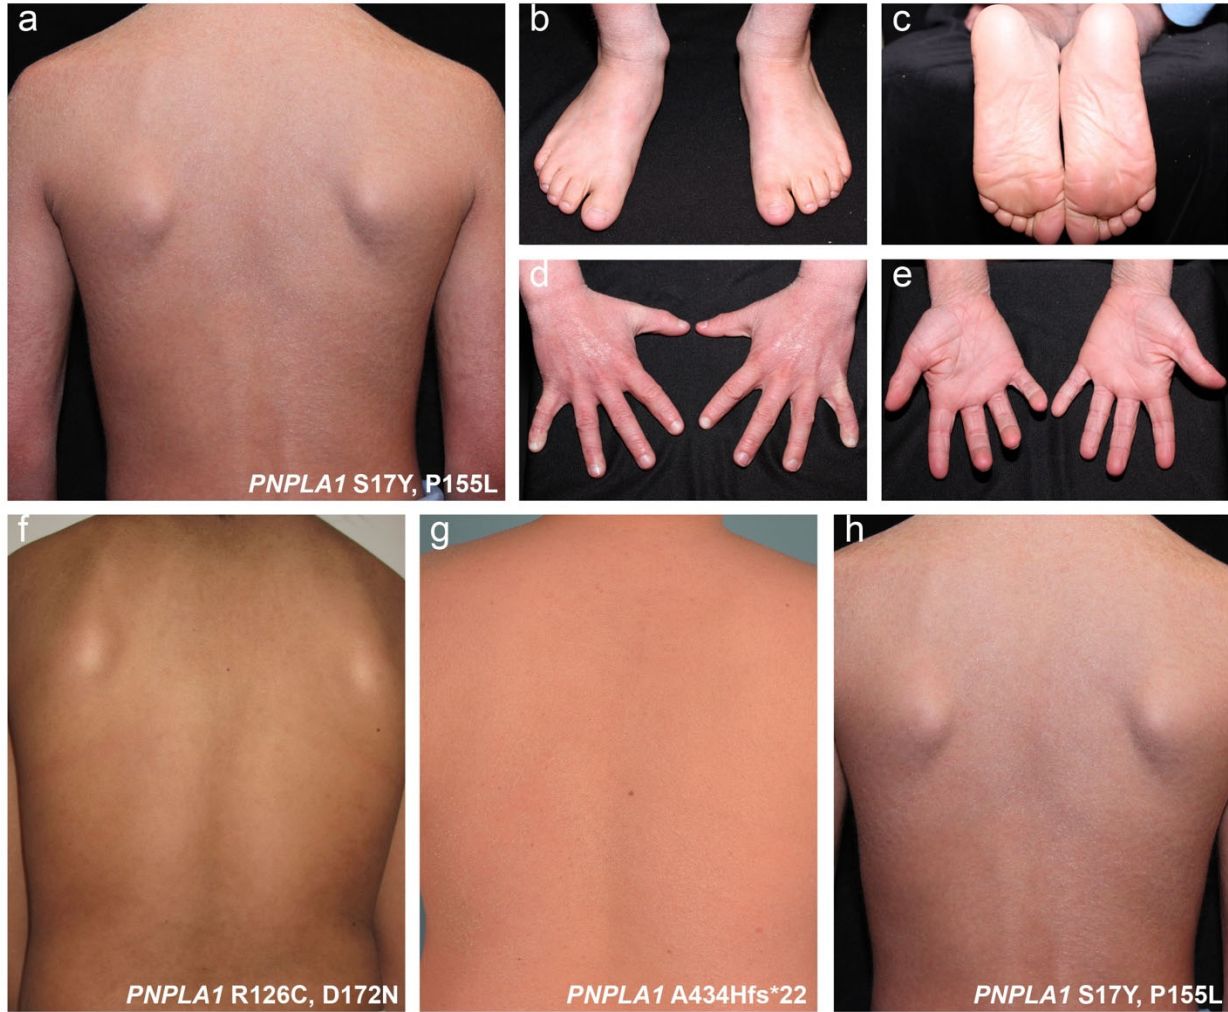

**eFigure 8. Phenotypes of ARCI due to *PNPLA1* mutations**

(a-e) The characteristic appearance of ichthyosis caused by mutations in *PNPLA1* included fine or plate-like scale and a varying degree of erythema. PPK was most often absent, but mild when present. The range of phenotypic manifestations included mild to moderate erythema with fine white scale (f-g) and mild erythema with more severe scale (h).

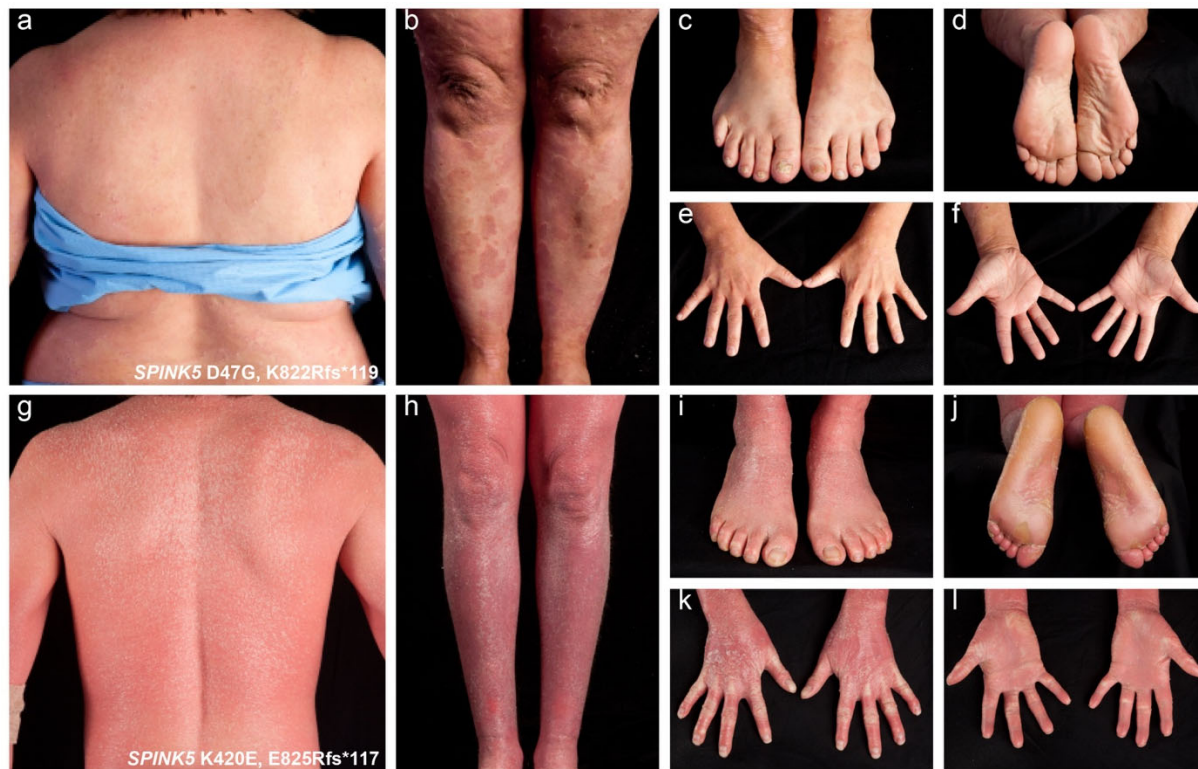

**eFigure 9. Phenotypes of Netherton syndrome due to *SPINK5* mutations**

(a-f) The *distinguishing feature* of ichthyosis caused by *SPINK5* mutations is ichthyosis linearis circumflexa (ILC), which presents as polycyclic erythematous plaques with a double-edge configuration. However, ichthyosis caused by *SPINK5* mutations can also resemble CIE. (g-l) This subject has characteristic findings of CIE, including severe erythema with fine white scale and moderate PPK.



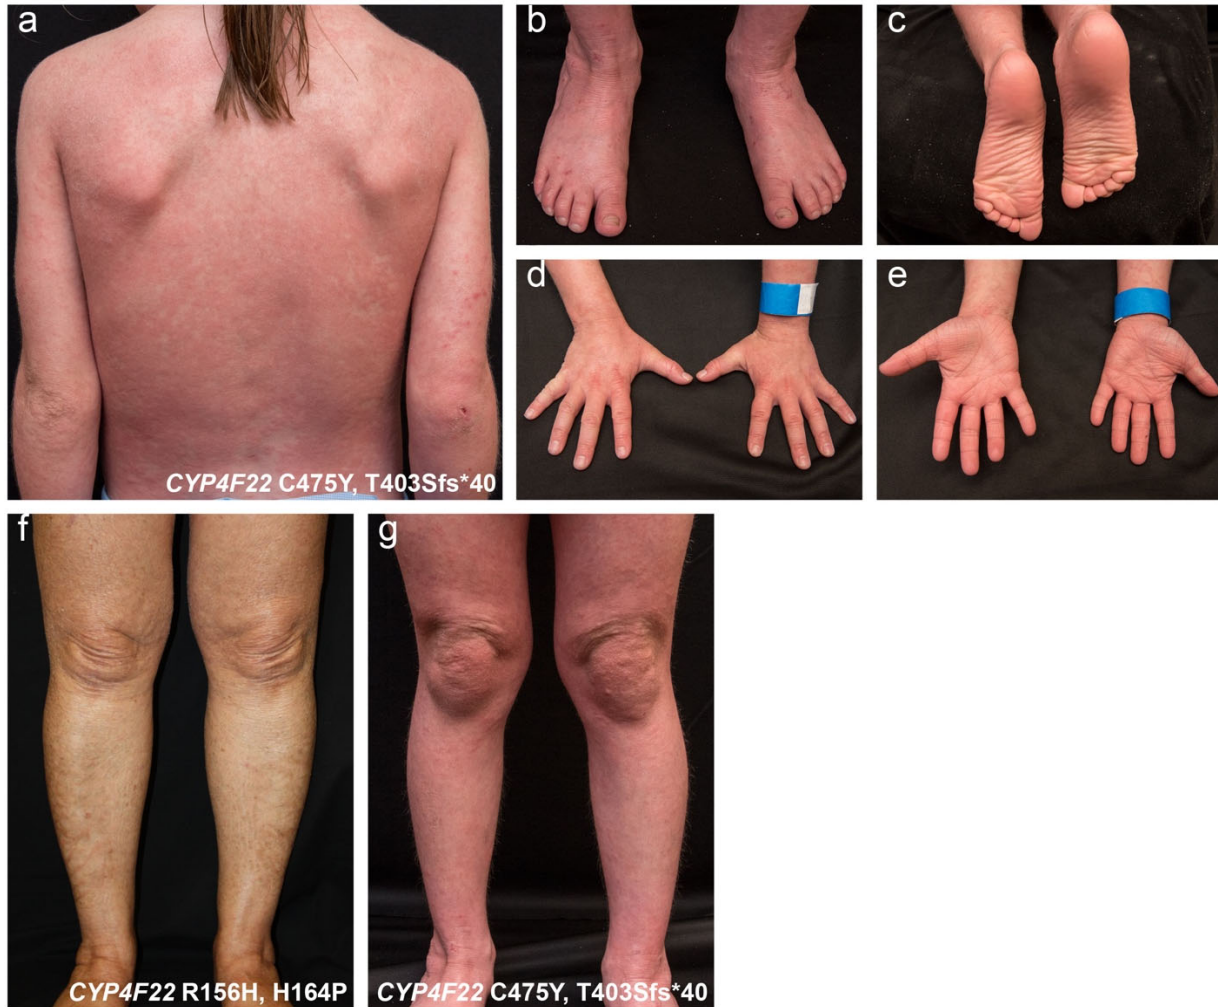

**eFigure 10. Phenotypes of ARCI due to *CYP4F22* mutations**

(a-e) The characteristic appearance of ichthyosis caused by mutations in *CYP4F22* include fine, white or plate-like scale, mild to severe erythema, and absence of PPK. Phenotypic manifestations range from imperceptible pink erythema and plate like scale (f) to moderate to severe erythema with fine, white scale (g).



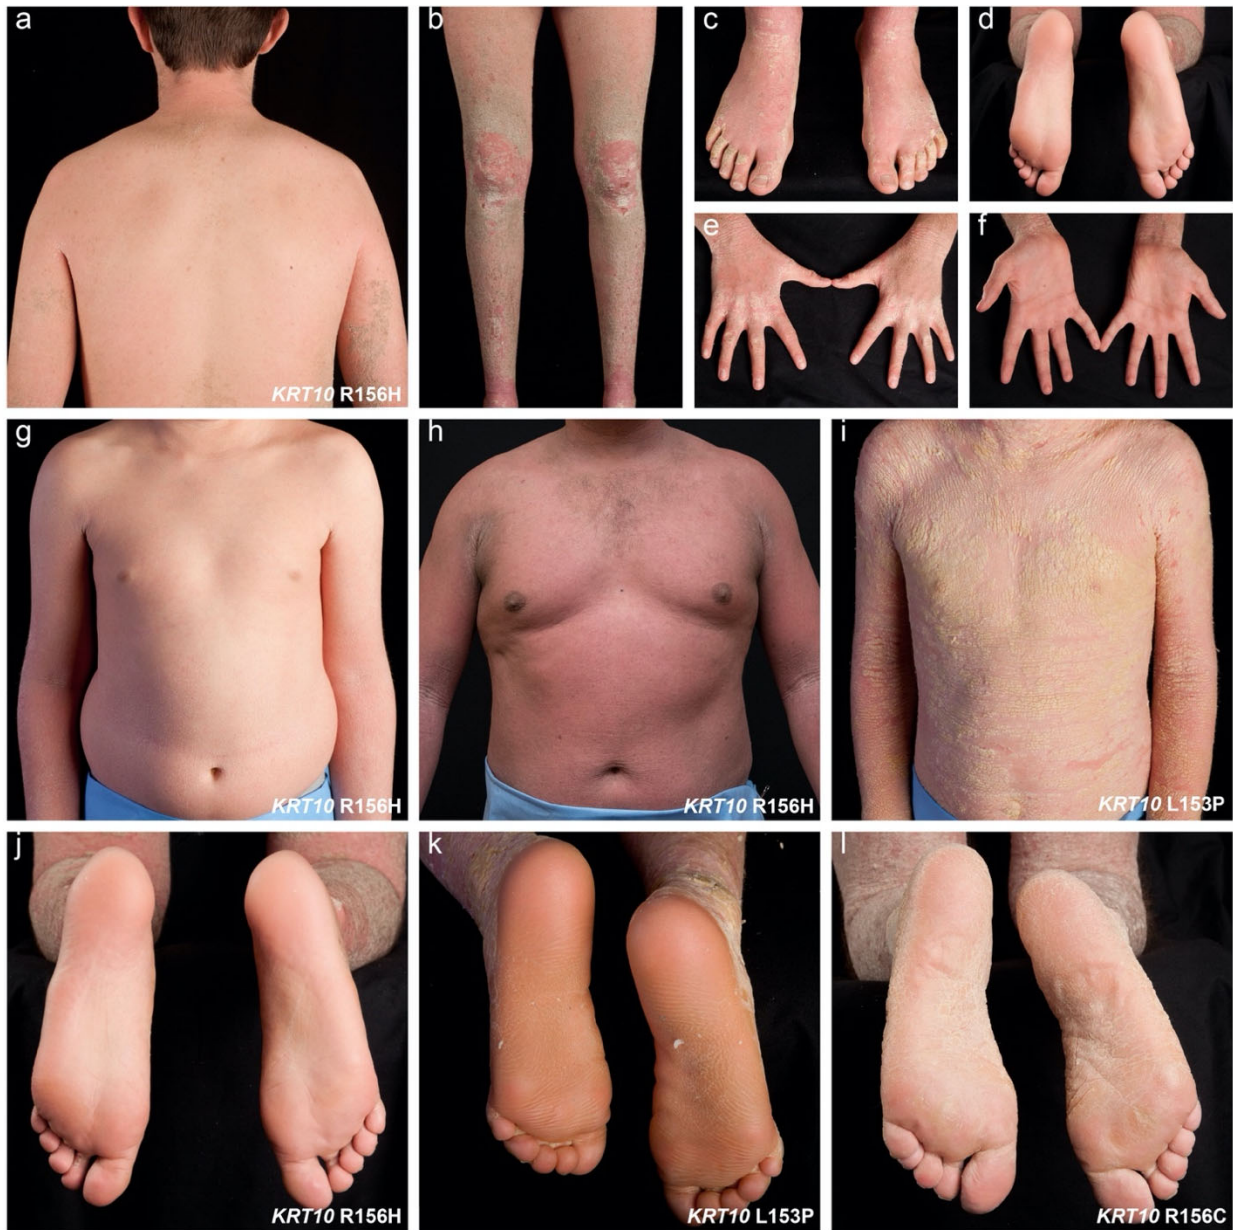

**eFigure 11. Phenotypes of EI due to *KRT10* mutations**

(a-f) The characteristic appearance of ichthyosis caused by mutations in *KRT10* include columns of scale and skin fragility, especially at sites of trauma. The range of skin findings include discontinuous regions of hyperkeratotic surface accentuation, including organized or geometric exaggeration of coarse skin markings (g) to pink/red erythema with scale primarily in intertriginous areas (h), and confluent, white/yellow columns of scale (i). (j-l) PPK, when present, is smooth with occasional focal accentuation.

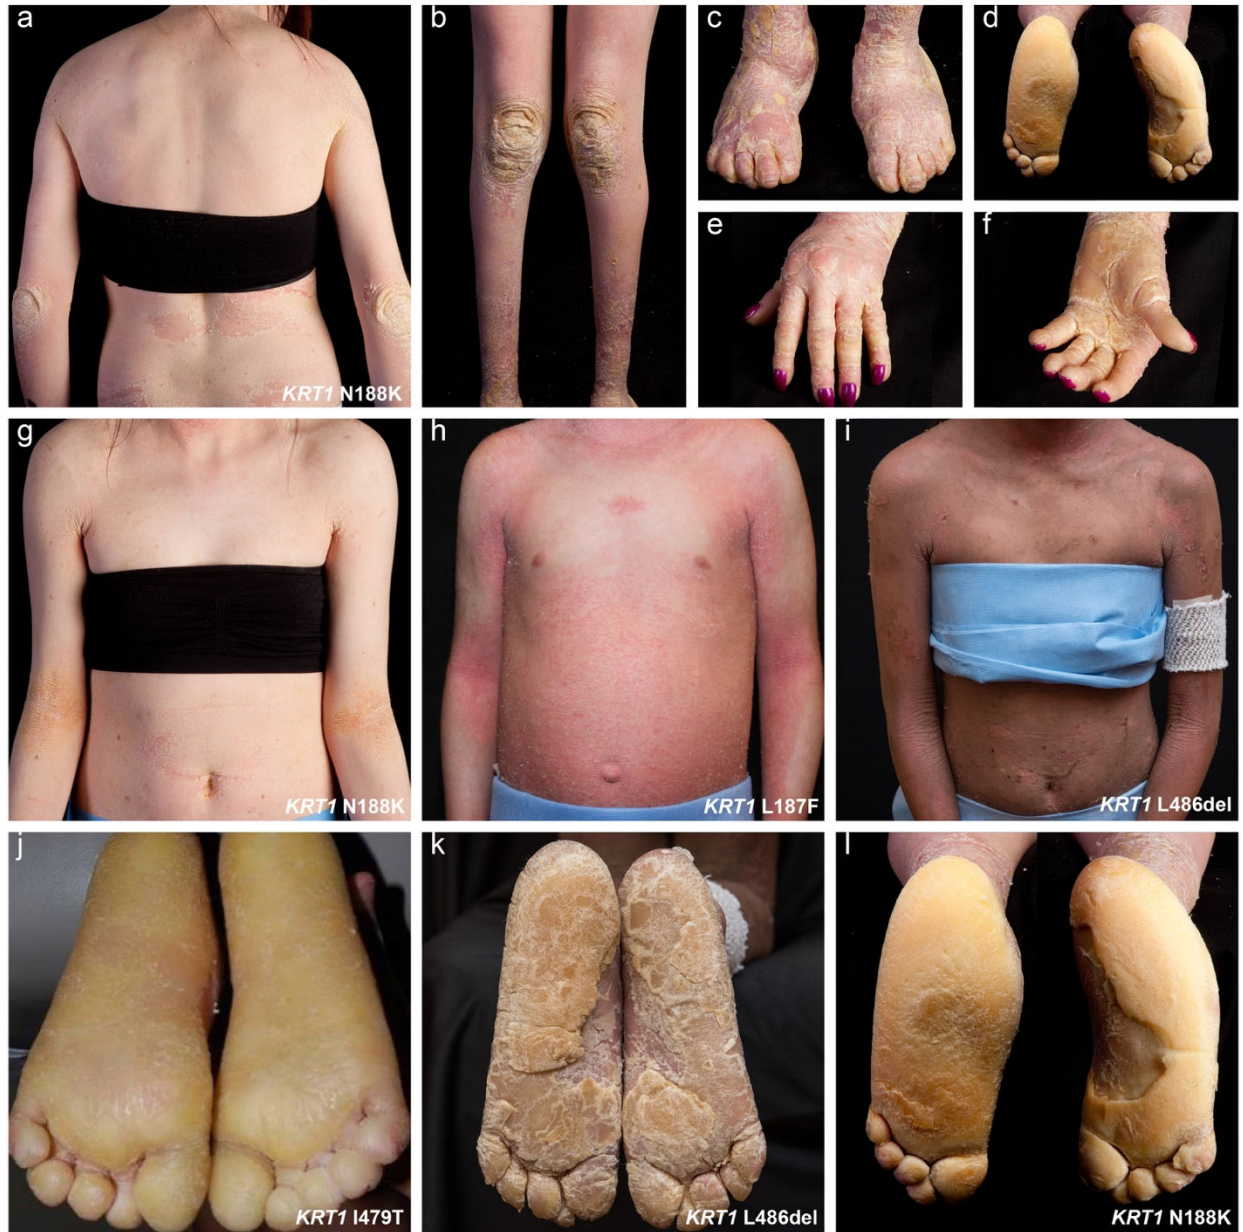

**eFigure 12. Phenotypes of EI due to *KRT1* mutations**

The characteristic appearance of ichthyosis caused by *KRT1* mutations included skin fragility, especially at sites of trauma, and columns of scale that is accentuated over the extensor surfaces of joints, particularly knees and elbows. (a-f) *Distinguishing features* included thick, often functionally limiting PPK. Skin findings ranged from columns of scale most prominent in the intertriginous areas and mild erythema (g) to confluent, organized or geometric exaggeration of coarse skin markings with pink erythema and marked skin fragility (h and i). There was significant PPK in all cases, ranging from moderate and smooth (j), moderate and patchy (panel k), to severe and smooth PPK (panel l).
